# Supplementary material for: Contribution à l'étude du mécanisme d'action de l'isoniazide et conception de nouveaux dérivés `a activité antituberculeuse potentielle
Source: Royal Society of Chemistry journal article supplement (doi:10.1039/d3cp06170a), 2004-01-01
Supplement: d3cp06170a1.zip [file d3cp06170a1.zip]

Electronic Supplementary Information

# Computational predictions of interfacial tension, surface tension, and surfactant adsorption isotherms

Author: Jing Li,<sup>a</sup> Carlos Amador<sup>b</sup> and Mark R. Wilson<sup>\*a</sup>

<sup>a</sup> Department of Chemistry, Durham University, Stockton Road, Durham, DH1 3LE, UK.

<sup>b</sup> Newcastle Innovation Centre, Procter & Gamble Ltd., Newcastle Upon Tyne, NE12 9BZ, UK.

E-mail: mark.wilson@durham.ac.uk

## S1 Force field testing

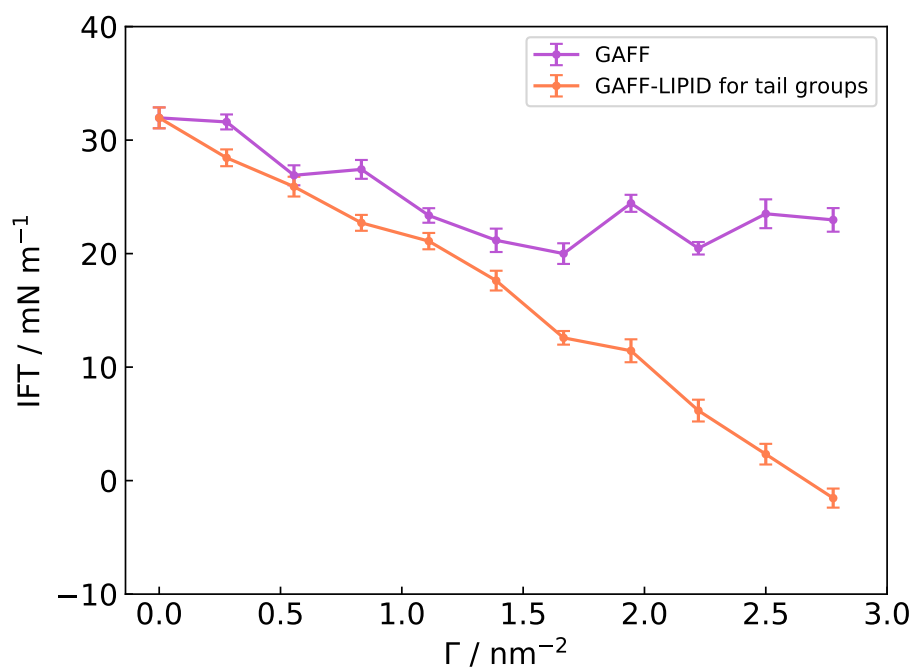

Figure S1: Simulated interfacial tensions (IFT) as a function of surface concentration ( $\Gamma$ ) for SDS molecules at a water-triolein interface, with GAFF (purple) and GAFF-LIPID for tail groups (orange).

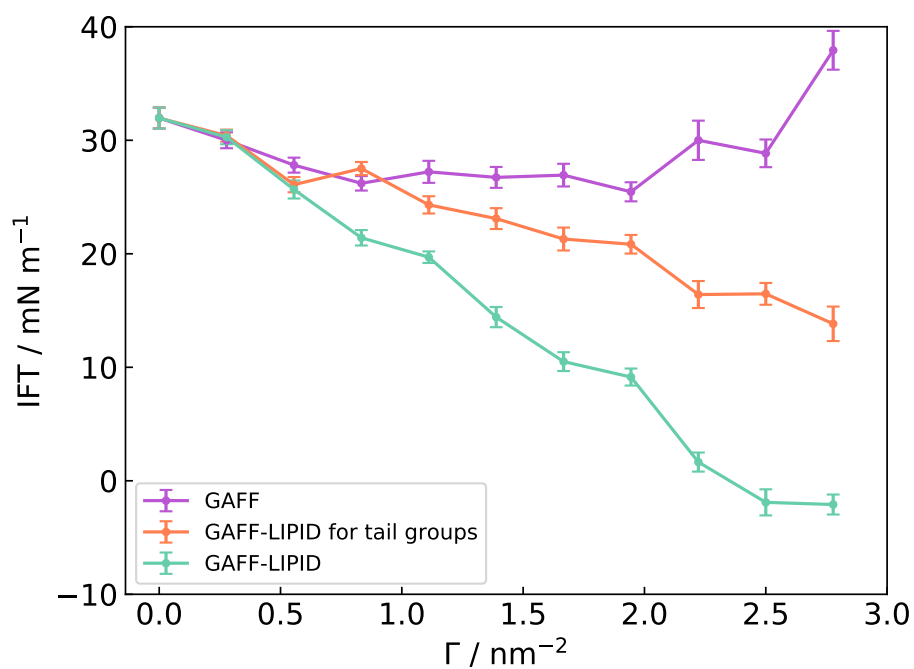

Figure S2: Simulated interfacial tensions (IFT) as a function of surface concentration ( $\Gamma$ ) for C15E7 molecules at a water-triolein interface, with GAFF (purple), GAFF-LIPID for tail groups (orange) and GAFF-LIPID for both tail groups and head groups (green).

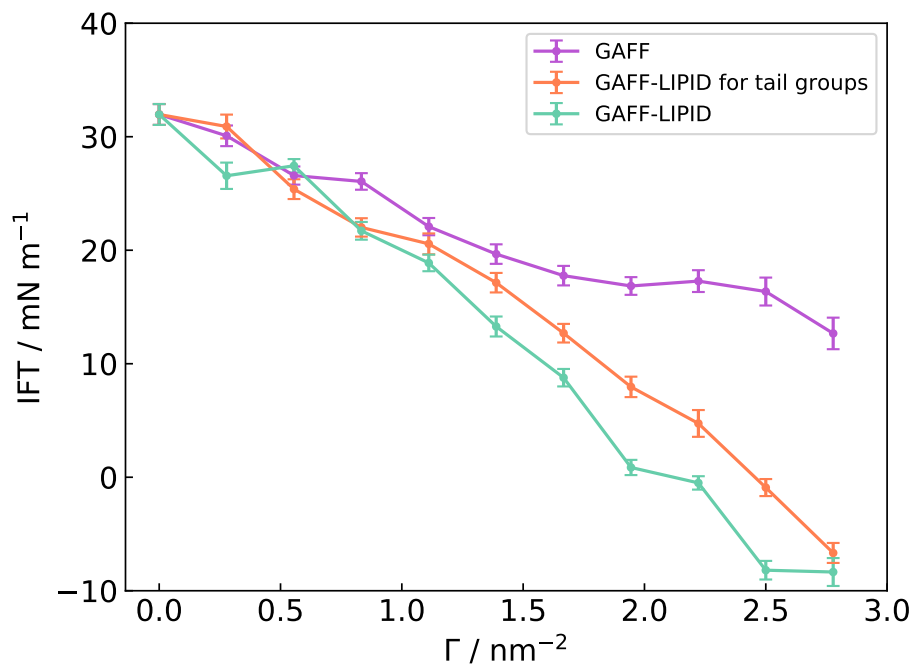

Figure S3: Simulated interfacial tensions (IFT) as a function of surface concentration ( $\Gamma$ ) for SLE3S molecules at a water-triolein interface, with GAFF (purple), GAFF-LIPID for tail groups (orange) and GAFF-LIPID for both tail groups and head groups (green).

## S2 Force field modifications

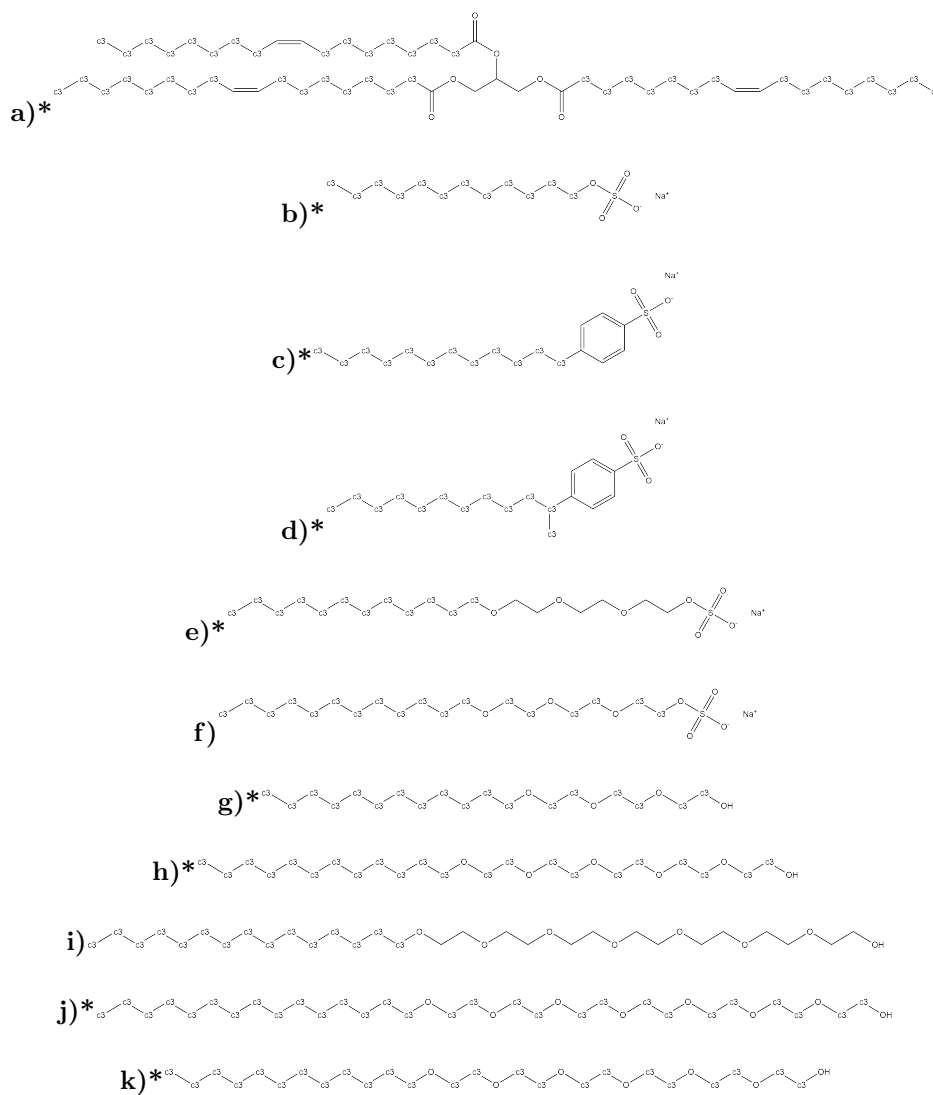

Figure S4: Molecular structures used in this study. A \* symbol marks those structures where force field modifications were employed: (a) triolein, (b) SDS, (c) SDBS, (d) SD2BS, (e) SLE3S (GAFF-LIPID for tail groups), (f) SLE3S (GAFF-LIPID), (g) C12E3, (h) C12E5, (i) C15E7 (GAFF-LIPID for tail groups), (j) C15E7 (GAFF-LIPID) and (k) C12E6.

We used the Lennard-Jones  $\sigma$  and  $\epsilon$  parameters for the “atomtype c3” from the GAFF-LIPID force field for the c3 atoms of the labelled molecules in figure S4. In addition, Lennard-Jones  $\sigma$  and  $\epsilon$  parameters for “atomtype hc” from GAFF-LIPID are utilised in force field modifications for hc atoms in the above molecules. We have also used dihedral angle parameters from GAFF-LIPID for all c3-c3-c3-c3 torsions in these molecules.<sup>[1]</sup>

### S3 IFT results

Table S1: Simulated interfacial tensions (IFT, with the unit of  $\text{mN m}^{-1}$ ) of water-surfactants-triolein interfaces, with GAFF/GAFF-LIPID parameters and TIP3P water model.

| $\Gamma/\text{nm}^{-2}$ | SDS              | SDBS             | SD2BS            | SLE3S            |
|-------------------------|------------------|------------------|------------------|------------------|
| 0                       | $31.96 \pm 0.92$ | $31.96 \pm 0.92$ | $31.96 \pm 0.92$ | $31.96 \pm 0.92$ |
| 0.28                    | $28.44 \pm 0.74$ | $30.94 \pm 0.63$ | $30.46 \pm 1.09$ | $30.90 \pm 1.05$ |
| 0.56                    | $25.90 \pm 0.87$ | $31.93 \pm 0.71$ | $27.73 \pm 0.70$ | $25.38 \pm 0.87$ |
| 0.83                    | $22.71 \pm 0.70$ | $28.40 \pm 0.68$ | $28.79 \pm 0.79$ | $22.01 \pm 0.81$ |
| 1.11                    | $21.10 \pm 0.72$ | $25.79 \pm 0.56$ | $25.26 \pm 0.73$ | $20.56 \pm 0.92$ |
| 1.39                    | $17.62 \pm 0.87$ | $22.56 \pm 0.84$ | $19.14 \pm 0.79$ | $17.14 \pm 0.86$ |
| 1.67                    | $12.58 \pm 0.60$ | $17.42 \pm 0.84$ | $13.56 \pm 0.88$ | $12.69 \pm 0.82$ |
| 1.94                    | $11.44 \pm 1.01$ | $17.51 \pm 0.92$ | $11.70 \pm 0.88$ | $7.96 \pm 0.90$  |
| 2.22                    | $6.17 \pm 0.96$  | $15.89 \pm 0.88$ | $3.69 \pm 1.61$  | $4.74 \pm 1.18$  |
| 2.50                    | $2.33 \pm 0.91$  | $14.06 \pm 0.99$ | $-0.74 \pm 0.96$ | $-0.91 \pm 0.75$ |
| 2.78                    | $-1.54 \pm 0.84$ | $10.06 \pm 1.45$ | $-6.80 \pm 0.97$ | $-6.67 \pm 0.88$ |

Table S2: Simulated interfacial tensions (IFT, with the unit of  $\text{mN m}^{-1}$ ) of water-surfactants-triolein interfaces, with GAFF/GAFF-LIPID parameters and TIP3P water model.

| $\Gamma/\text{nm}^{-2}$ | C12E3            | C12E5            | C15E7            |
|-------------------------|------------------|------------------|------------------|
| 0                       | $31.96 \pm 0.92$ | $31.96 \pm 0.92$ | $31.96 \pm 0.92$ |
| 0.28                    | $30.92 \pm 0.66$ | $32.68 \pm 0.95$ | $30.27 \pm 0.62$ |
| 0.56                    | $31.19 \pm 0.78$ | $28.22 \pm 0.79$ | $25.66 \pm 0.79$ |
| 0.83                    | $24.87 \pm 0.45$ | $24.57 \pm 0.73$ | $21.41 \pm 0.68$ |
| 1.11                    | $23.34 \pm 0.66$ | $19.81 \pm 0.83$ | $19.70 \pm 0.51$ |
| 1.39                    | $21.65 \pm 0.97$ | $19.47 \pm 0.78$ | $14.42 \pm 0.89$ |
| 1.67                    | $18.33 \pm 0.94$ | $14.88 \pm 0.90$ | $10.50 \pm 0.83$ |
| 1.94                    | $17.23 \pm 0.62$ | $11.29 \pm 0.63$ | $9.14 \pm 0.75$  |
| 2.22                    | $16.05 \pm 0.78$ | $8.23 \pm 0.48$  | $1.65 \pm 0.84$  |
| 2.50                    | $12.59 \pm 1.11$ | $2.70 \pm 0.75$  | $-1.90 \pm 1.15$ |
| 2.78                    | $7.74 \pm 0.93$  | $-2.12 \pm 1.12$ | $-2.09 \pm 0.88$ |

## S4 ST results

Table S3: Simulated surface tensions (ST, with the unit of  $\text{mN m}^{-1}$ ) of water-surfactants-vacuum interfaces, with GAFF/GAFF-LIPID parameters and OPC4 water model.

| $\Gamma/\text{nm}^{-2}$        | SDS                                | SDBS             | SD2BS            | SLE3S            |
|--------------------------------|------------------------------------|------------------|------------------|------------------|
| 0                              | $70.66 \pm 0.20$                   | $70.66 \pm 0.20$ | $70.66 \pm 0.20$ | $70.66 \pm 0.20$ |
| 0.28                           | $68.83 \pm 0.18$                   | $69.66 \pm 0.19$ | $69.35 \pm 0.20$ | $69.90 \pm 0.15$ |
| 0.56                           | $67.63 \pm 0.19$                   | $68.38 \pm 0.22$ | $68.46 \pm 0.21$ | $68.73 \pm 0.23$ |
| 0.83                           | $65.36 \pm 0.17$                   | $67.58 \pm 0.18$ | $66.79 \pm 0.23$ | $67.11 \pm 0.31$ |
| 1.11                           | $63.36 \pm 0.23$                   | $65.70 \pm 0.25$ | $65.23 \pm 0.36$ | $64.05 \pm 0.23$ |
| 1.39                           | $59.83 \pm 0.27$                   | $63.18 \pm 0.27$ | $62.15 \pm 0.24$ | $60.01 \pm 0.21$ |
| 1.67                           | $55.97 \pm 0.24$                   | $59.60 \pm 0.23$ | $56.74 \pm 0.17$ | $53.37 \pm 0.27$ |
| 1.94                           | $51.50 \pm 0.35$                   | $54.12 \pm 0.28$ | $49.28 \pm 0.30$ | $45.12 \pm 0.37$ |
| 2.22                           | $45.44 \pm 0.42$                   | $49.19 \pm 0.39$ | $40.05 \pm 0.35$ | $36.47 \pm 0.43$ |
| 2.50                           | $40.43 \pm 0.41$                   | $43.51 \pm 0.34$ | $31.70 \pm 0.50$ | $28.15 \pm 0.57$ |
| 2.78                           | $34.51 \pm 0.43$                   | $38.92 \pm 0.44$ | $23.43 \pm 0.58$ | $20.17 \pm 0.68$ |
| $\Gamma_{\text{MAX}}$ (Exp)    | $1.94 \text{ nm}^{-2}$ [2]         | -                | -                | -                |
| $\text{ST}_{\text{CMC}}$ (Exp) | $39.5 \text{ mN m}^{-1}$ [2]       | -                | -                | -                |
| CMC (Exp)                      | $8.2 \times 10^{-3} \text{ M}$ [3] | -                | -                | -                |

Table S4: Simulated surface tensions (ST, with the unit of  $\text{mN m}^{-1}$ ) of water-surfactants-vacuum interfaces, with GAFF/GAFF-LIPID parameters and OPC4 water model.

| $\Gamma/\text{nm}^{-2}$        | C12E3                              | C12E5                              | C12E6                              | C15E7                              |
|--------------------------------|------------------------------------|------------------------------------|------------------------------------|------------------------------------|
| 0                              | $70.66 \pm 0.20$                   | $70.66 \pm 0.20$                   | $70.66 \pm 0.20$                   | $70.66 \pm 0.20$                   |
| 0.28                           | $69.51 \pm 0.16$                   | $69.38 \pm 0.21$                   | $69.36 \pm 0.19$                   | $69.29 \pm 0.16$                   |
| 0.56                           | $69.01 \pm 0.16$                   | $66.79 \pm 0.21$                   | $65.59 \pm 0.22$                   | $64.46 \pm 0.24$                   |
| 0.83                           | $66.92 \pm 0.20$                   | $61.70 \pm 0.25$                   | $59.30 \pm 0.15$                   | $57.64 \pm 0.27$                   |
| 1.11                           | $63.56 \pm 0.28$                   | $56.37 \pm 0.24$                   | $54.41 \pm 0.17$                   | $52.12 \pm 0.28$                   |
| 1.39                           | $59.75 \pm 0.25$                   | $51.84 \pm 0.30$                   | $48.60 \pm 0.34$                   | $47.82 \pm 0.33$                   |
| 1.67                           | $55.31 \pm 0.29$                   | $47.15 \pm 0.26$                   | $44.29 \pm 0.37$                   | $42.93 \pm 0.39$                   |
| 1.94                           | $50.27 \pm 0.33$                   | $41.64 \pm 0.35$                   | $38.70 \pm 0.26$                   | $37.40 \pm 0.49$                   |
| 2.22                           | $45.88 \pm 0.33$                   | $35.68 \pm 0.48$                   | $32.18 \pm 0.44$                   | $31.95 \pm 0.43$                   |
| 2.50                           | $40.13 \pm 0.21$                   | $28.63 \pm 0.38$                   | $25.69 \pm 0.48$                   | $27.07 \pm 0.50$                   |
| 2.78                           | $33.32 \pm 0.37$                   | $21.63 \pm 0.55$                   | $17.15 \pm 0.90$                   | $27.13 \pm 0.94$                   |
| $\Gamma_{\text{MAX}}$ (Exp)    | $2.50 \text{ nm}^{-2}$ [4]         | $2.22 \text{ nm}^{-2}$ [5]         | $2.22 \text{ nm}^{-2}$ [6]         | $2.22 \text{ nm}^{-2}$ [7]         |
| $\text{ST}_{\text{CMC}}$ (Exp) | $27.9 \text{ mN m}^{-1}$ [4]       | $30.5 \text{ mN m}^{-1}$ [5]       | $32.1 \text{ mN m}^{-1}$ [6]       | $34.6 \text{ mN m}^{-1}$ [7]       |
| CMC (Exp)                      | $5.2 \times 10^{-5} \text{ M}$ [5] | $6.4 \times 10^{-5} \text{ M}$ [5] | $8.7 \times 10^{-5} \text{ M}$ [8] | $3.5 \times 10^{-6} \text{ M}$ [9] |

## References

- [1] C. J. Dickson, L. Rosso, R. M. Betz, R. C. Walker and I. R. Gould, *Soft Matter*, 2012, **8**, 9617–9627.
- [2] M. Dahanayake, A. W. Cohen and M. J. Rosen, *J. Phys. Chem.*, 1986, **90**, 2413–2418.
- [3] P. H. Elworthy and K. J. Mysels, *J. Colloid Interface Sci.*, 1966, **21**, 331–347.
- [4] M. J. Rosen and L. D. Song, *J. Colloid Interface Sci.*, 1996, **179**, 261–268.
- [5] M. J. Rosen, A. W. Cohen, M. Dahanayake and X. Y. Hua, *J. Phys. Chem.*, 1982, **86**, 541–545.
- [6] J. E. Carless, R. A. Challis and B. A. Mulley, *J. Colloid Sci.*, 1964, **19**, 201–212.
- [7] K. Motomura, S.-I. Iwanaga, S. Uryu, H. Matsukiyo, M. Yamanaka and R. Matuura, *Colloids Surf.*, 1984, **9**, 19–31.
- [8] J. M. Corkill, J. F. Goodman and R. H. Ottewill, *Trans. Faraday Soc.*, 1961, **57**, 1627.
- [9] K. Meguro, Y. Takasawa, N. Kawahashi, Y. Tabata and M. Ueno, *J. Colloid Interface Sci.*, 1981, **83**, 50–56.
